# Supplementary material
Source: publisher site journal article supplement (https://www.dovepress.com/article/485953)
Supplement: Supplementary file 1 [file get_supplementary_file.php]

**Supplementary Table 1.** Diagnostic criteria for Guillain-Barré syndrome.

|  | NINDS criteria | | Brighton Collaboration  (Level of diagnostic certainty) | | | |
| --- | --- | --- | --- | --- | --- | --- |
|  | Required | Supportive | Level 1 (highest) | Level 2 | Level 3 | Level 4 (lowest) |
| Clinical features |  |  |  |  |  |  |
| Bilateral flaccid weakness of limbs | + | - | + | + | + | +/- |
| Decreased or absent deep tendon reflexes | + | - | + | + | + | +/- |
| Absence of alternative diagnosis | + | - | + | + | + | + |
| Additional clinical features |  |  |  |  |  |  |
| Monophasic course, time between onset and plateau  12 hours to 28 days | - | + | - | - | - | +/- |
| Relative symmetry | - | + | - | - | - | - |
| Mild sensory symptoms or signs | - | + | - | - | - | - |
| Progress (usually after 2–4 weeks of plateau) | - | + | - | - | - | - |
| Cranial nerve involvement (facial, bulbar, and oculomotor) | - | + | - | - | - | - |
| Autonomic dysfunction | - | + | - | - | - | - |
| Absence of fever at the onset of neuritis symptoms | - | + | - | - | - | - |
| CSF analysis |  |  |  |  |  |  |
| CSF white cell count <50 /μl (usually <10) | - | + | + | +† | - | +/- |
| CSF protein raised (after week 1) | - | + | + | +† | - | +/- |
| Nerve conduction studies* | - | + | + | +† | - | +/- |
| **Note:** NINDS = National Institute of Neurological Disorders and Stroke; CSF = cerebrospinal fluid. *The NINDS criteria suggested a demyelinating neuropathy while the Brighton criteria just suggested "compatible with a neuropathy". †To reach level 2 of the Brighton Collaboration criteria, either CSF or nerve conduction study results must be available. | | | | | | |

**Supplementary Table 2.** Causes of non-Guillain-Barré syndrome (N = 116)

| Causes | N (%) |
| --- | --- |
| Autoimmune neurological disorders, other causes | 15 (12.9) |
| Bell's palsy | 2 (1.7) |
| Botulism | 2 (1.7) |
| Chronic inflammatory demyelinating polyneuropathy | 9 (7.8) |
| Encephalopathy, metabolic | 1 (0.9) |
| Epidural abscess | 2 (1.7) |
| Limb edema, steroid related | 1 (0.9) |
| Malignant tumor, brain | 1 (0.9) |
| Meningitis | 1 (0.9) |
| Migraine | 1 (0.9) |
| Myelopathy | 7 (6.0) |
| Myopathy | 4 (3.4) |
| Neurosyphilis | 1 (0.9) |
| Osteomyelitis, thoracic spine, with cord compression and paraplegia | 1 (0.9) |
| Periodic paralysis | 2 (1.7) |
| Plexopathy, brachial | 1 (0.9) |
| Polyarthralgia | 1 (0.9) |
| Polyneuropathy, other causes | 35 (30.2) |
| Porphyria | 1 (0.9) |
| Psychiatric disorders | 10 (8.6) |
| Radiculopathy, other causes | 12 (10.3) |
| Remote Guillain-Barré syndrome* | 3 (2.6) |
| Sarcoidosis | 1 (0.9) |
| Seizure | 1 (0.9) |
| Zoster, with neurological complications | 1 (0.9) |

**Note:** N = number. *Prior history of being diagnosed as Guillain-Barré syndrome at other hospitals, but not during this hospitalization.
